# Supplementary material
Source: PubMed Central journal article supplement (PMC7469390)
Supplement: ao0c02618_si_001.pdf [file ao0c02618_si_001.pdf]

## **Supporting information**

### **Development of Pomegranate Extract Loaded Solid Lipid Nanoparticles: Quality by design approach to screen the variables affecting the quality attributes and characterization**

Noha Badawi \*<sup>1</sup>, Khalid El-Say <sup>2,3</sup>, Dalia Attia <sup>1</sup>, Mohamed El-Nabarawi <sup>4</sup>,  
Mohey Elmazar <sup>5</sup>, Mahmoud Teaima <sup>4</sup>

<sup>1</sup>Department of Pharmaceutics, Faculty of Pharmacy, The British University in Egypt, P.O. Box 11837, Cairo, Egypt

<sup>2</sup>Department of Pharmaceutics, King Abdulaziz University, P.O. Box 80260, Jeddah 21589, Saudi Arabia

<sup>3</sup>Department of Pharmaceutics, Faculty of Pharmacy, Al-Azhar University, Cairo 11651, Egypt

<sup>4</sup>Department of Pharmaceutics, Faculty of Pharmacy, P.O. Box 11562, Cairo University, Cairo, Egypt

<sup>5</sup>Department of Pharmacology, Faculty of Pharmacy, The British University in Egypt, P.O. Box 11837, Cairo, Egypt

#### **Corresponding author information:**

Noha Badawi

Email: [Noha.alaa@bue.edu.eg](mailto:Noha.alaa@bue.edu.eg)

El Sherouk City, Misr Ismailia Road, P.O. Box 11562 Cairo-Egypt

ORCID ID is 0000-0002-3823-5804

Estimated Response Surface  
 Surfactant type=-1.0,Surfactant concentration=6.5,Cosurfactant concentration=87.5,Sonication time=20.0,Sonication amp

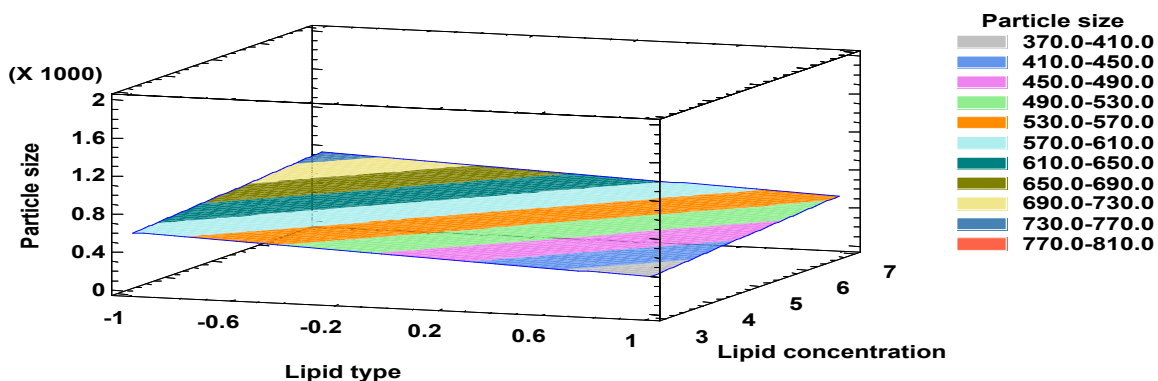

Figure (S1): Estimated three-dimensional response surfaces plot for the effect of lipid type and lipid concentration on the particle size (Y<sub>1</sub>)

Estimated Response Surface  
 Lipid type=-1.0,Surfactant type=-1.0,Cosurfactant concentration=87.5,Sonication time=20.0,Sonication amplitude=

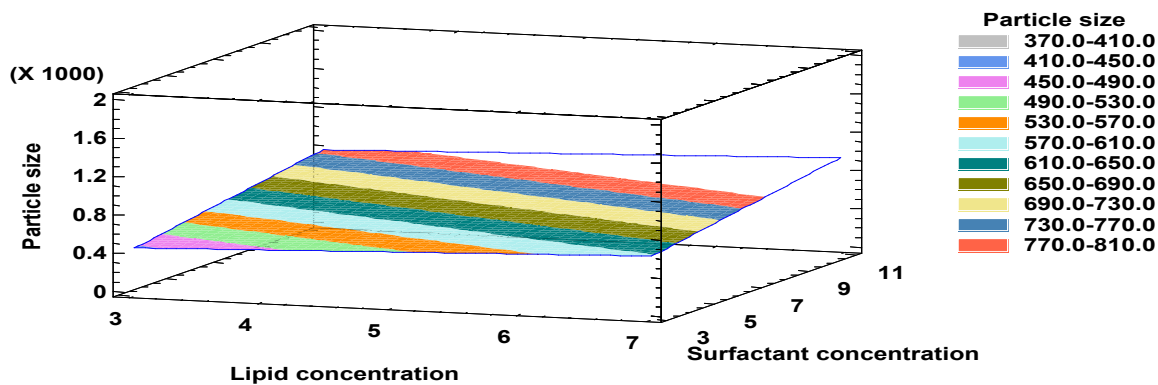

Figure (S2): Estimated three-dimensional response surfaces plot for the effect of lipid concentration and surfactant concentration on the particle size ( $Y_1$ )

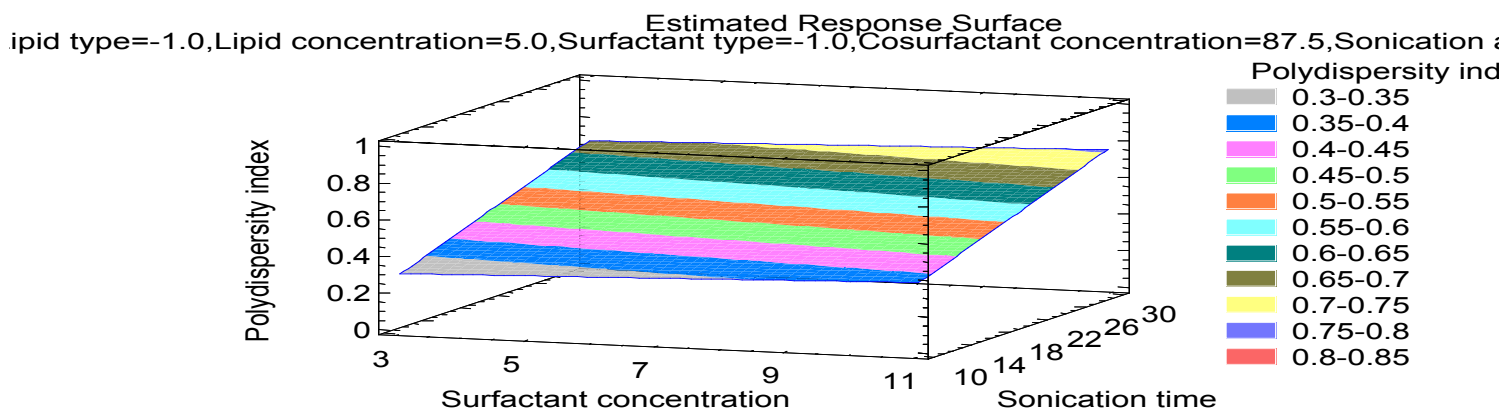

Figure (S3): Estimated three-dimensional response surfaces plot for the effect of surfactant concentration and sonication time on the polydispersity index ( $Y_2$ )

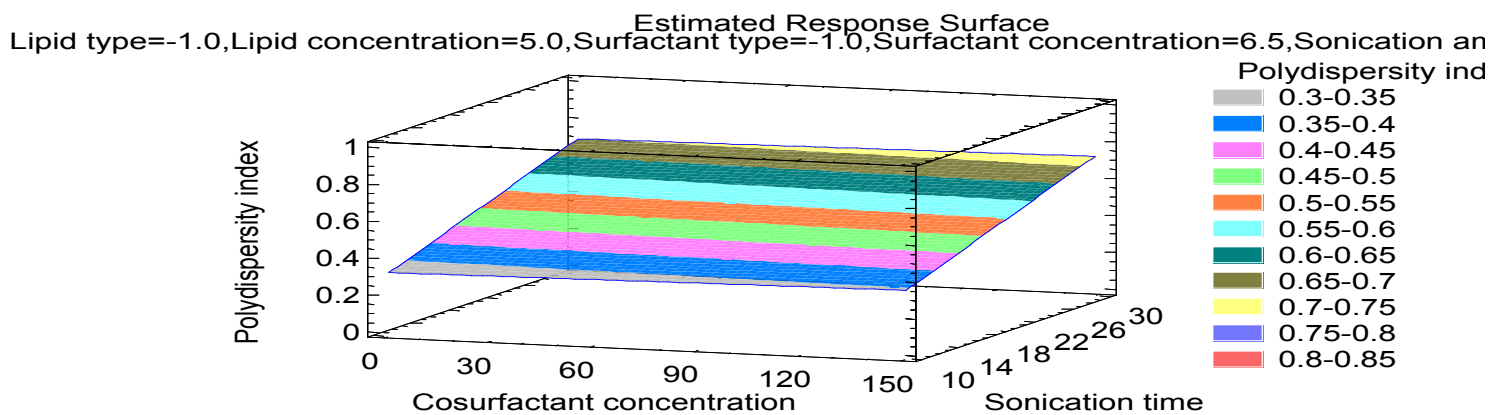

Figure (S4): Estimated three-dimensional response surfaces plot for the effect of co-surfactant concentration and sonication time on the polydispersity index ( $Y_2$ )

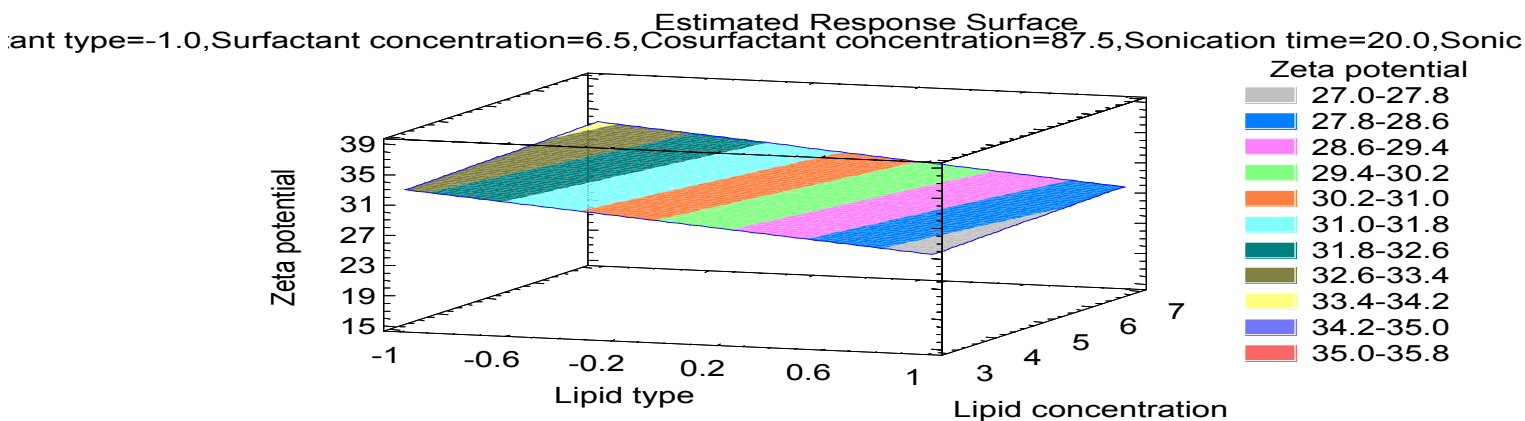

Figure (S5): Estimated three-dimensional response surfaces plot for the effect of lipid type and lipid concentration on the zeta potential ( $Y_3$ )

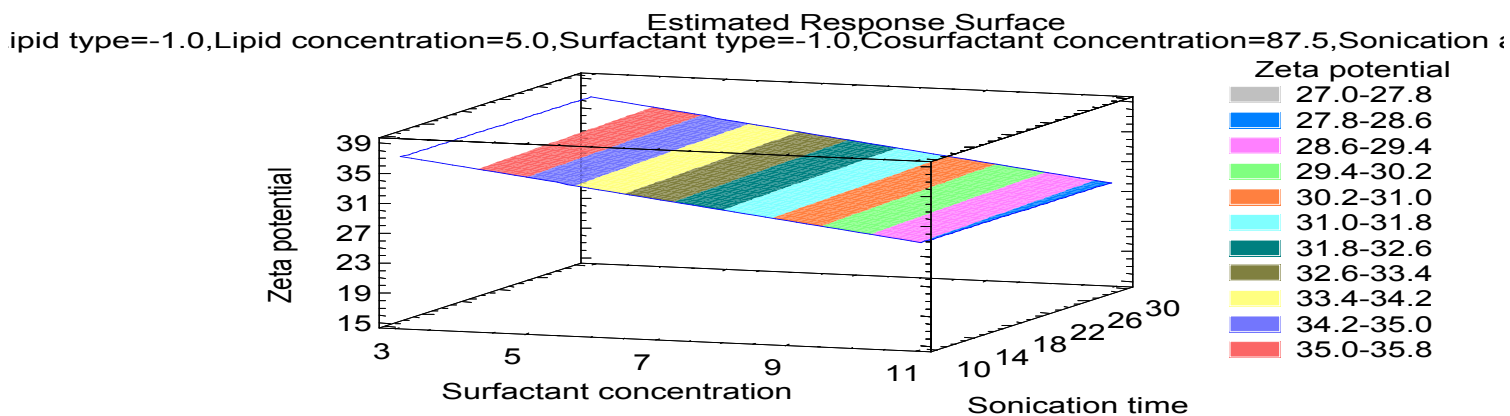

Figure (S6): Estimated three-dimensional response surfaces plot for the effect of surfactant concentration and sonication time on the zeta potential ( $Y_3$ )

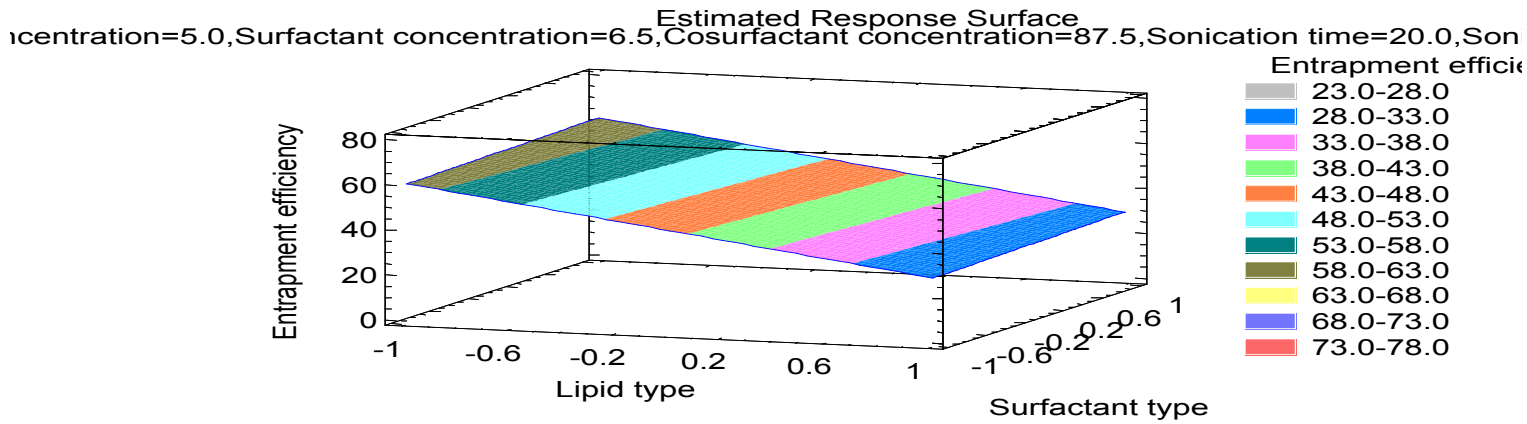

Figure (S7): Estimated three-dimensional response surfaces plot for the effect of lipid type and surfactant type on the entrapment efficiency % ( $Y_4$ )

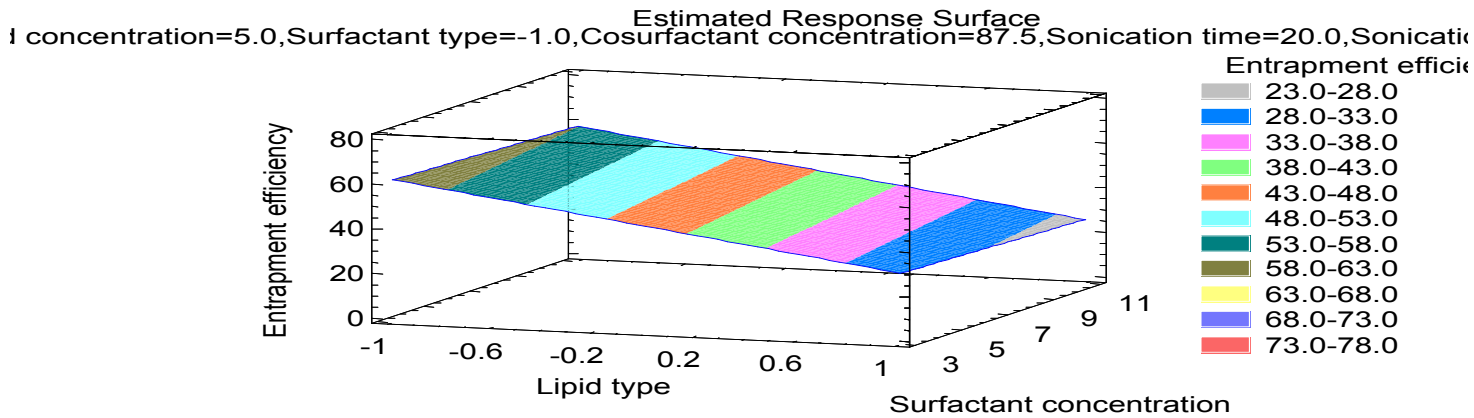

Figure (S8): Estimated three-dimensional response surfaces plot for the effect of lipid type and surfactant concentration on the entrapment efficiency % ( $Y_4$ )

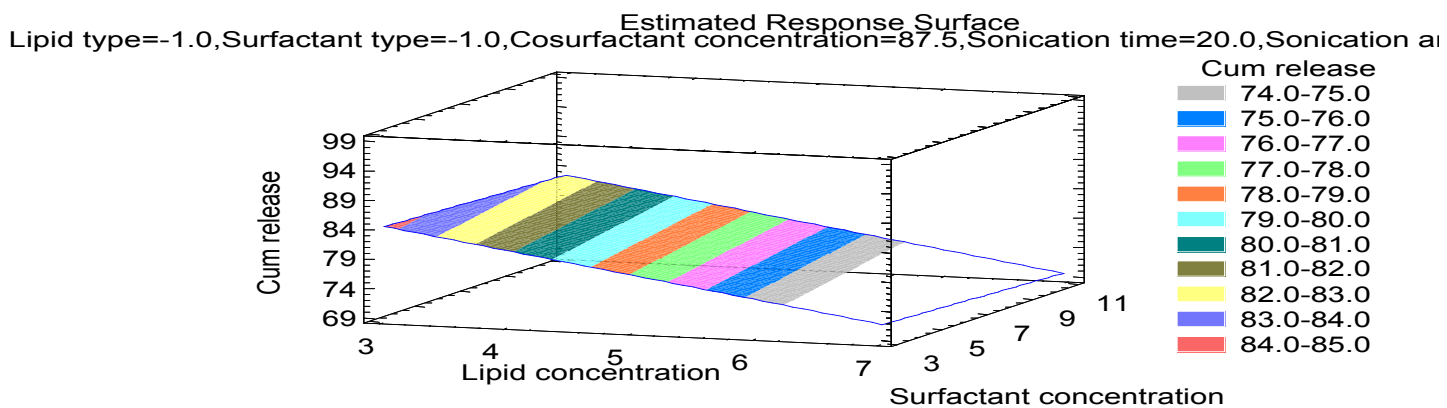

Figure (S9): Estimated three-dimensional response surfaces plot for the effect of lipid concentration and surfactant type on the cumulative % drug release ( $Y_5$ )

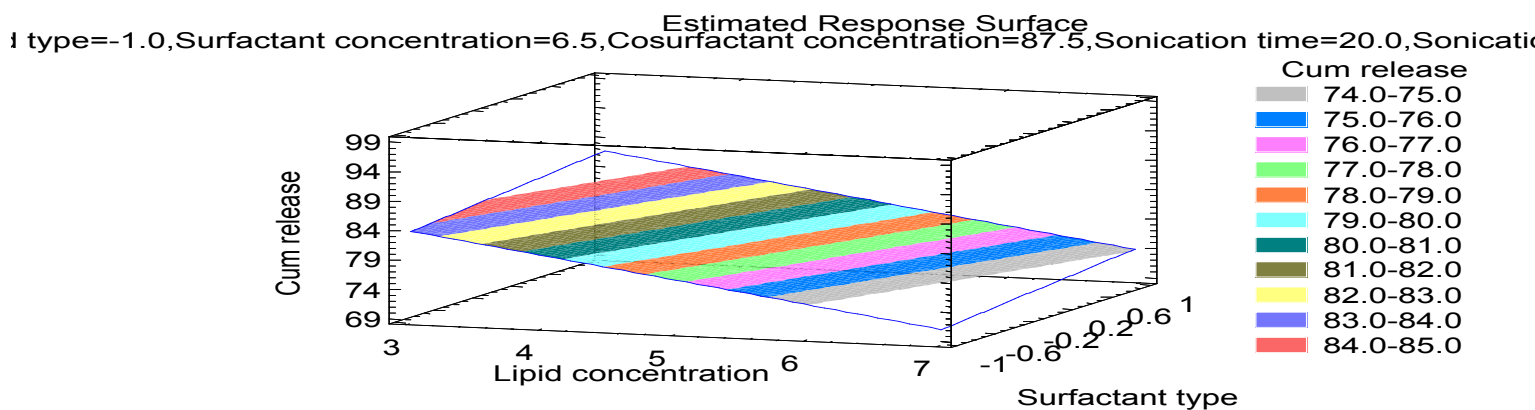

Figure (S10): Estimated three-dimensional response surfaces plot for the effect of lipid concentration and surfactant concentration on the cumulative % drug release ( $Y_5$ )
